# Supplementary material for: Design and fabrication of polyaniline/Bi2MoO6 nanocomposites for enhanced visible-light-driven photocatalysis
Source: Royal Society of Chemistry journal article supplement (doi:10.1039/c9nj01651a), 2019-01-01
Supplement: c9nj01651a1.pdf [file c9nj01651a1.pdf]

***Electronic Supplementary Information for***

**Design and fabrication of polyaniline/Bi<sub>2</sub>MoO<sub>6</sub> nanocomposites for enhanced visible-light-driven photocatalysis**

Tiantian Feng<sup>‡,a</sup>, Hao Yin<sup>‡,a</sup>, Hao Jiang<sup>a</sup>, Xin Chai<sup>a</sup>, Xinle Li<sup>b</sup>, Deyang Li<sup>c</sup>, Jing Wu<sup>a</sup>, Xuanhe Liu<sup>a</sup>,  
Bing Sun<sup>\*,a</sup>

a School of Science, China University of Geosciences (Beijing), Beijing 100183, P. R. China

b The Molecular Foundry, Lawrence Berkeley National Laboratory, Berkeley, CA 94720,  
United States.

c School of Chemistry and Chemical Engineering, Harbin Institute of Technology, Harbin  
150001, P. R. China

\* Corresponding author: B. Sun

Email: [sunbing@cugb.edu.cn](mailto:sunbing@cugb.edu.cn)

Tel: +86-10-82322758

‡ These authors contributed equally to this work.

There are no conflicts of interest to declare.

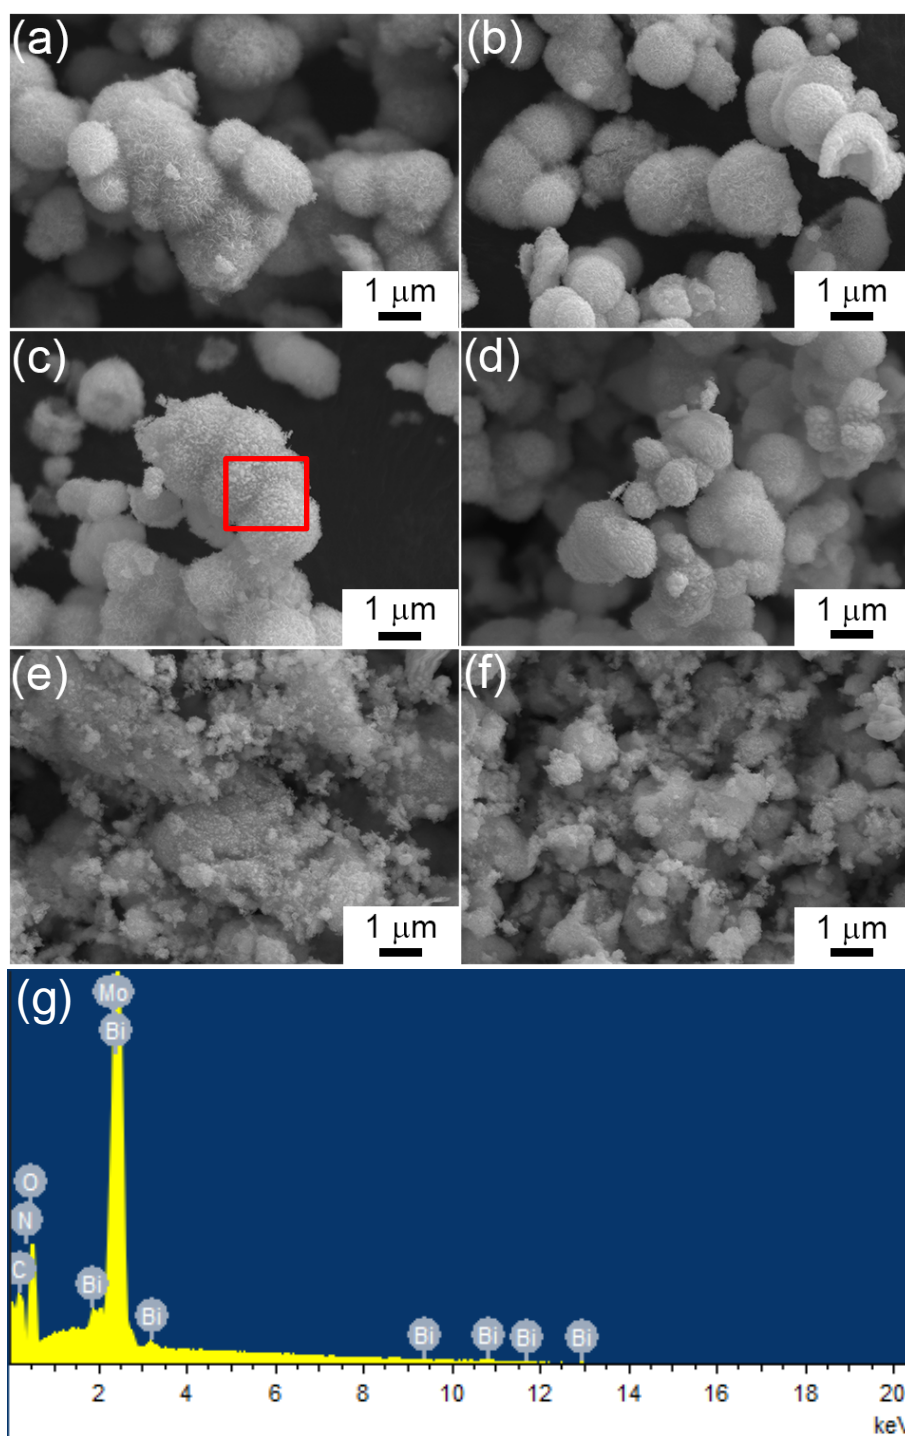

**Figure S1.** SEM images of (a) pure Bi<sub>2</sub>MoO<sub>6</sub>, (b) PANI<sub>0.25</sub>/Bi<sub>2</sub>MoO<sub>6</sub>, (c) PANI<sub>0.5</sub>/Bi<sub>2</sub>MoO<sub>6</sub>, (d) PANI<sub>0.75</sub>/Bi<sub>2</sub>MoO<sub>6</sub>, (e) PANI<sub>1.0</sub>/Bi<sub>2</sub>MoO<sub>6</sub> and (f) PANI<sub>2.0</sub>/Bi<sub>2</sub>MoO<sub>6</sub>. (g) Energy dispersive X-Ray (EDX) spectrum of the selected area in Figure S1c.

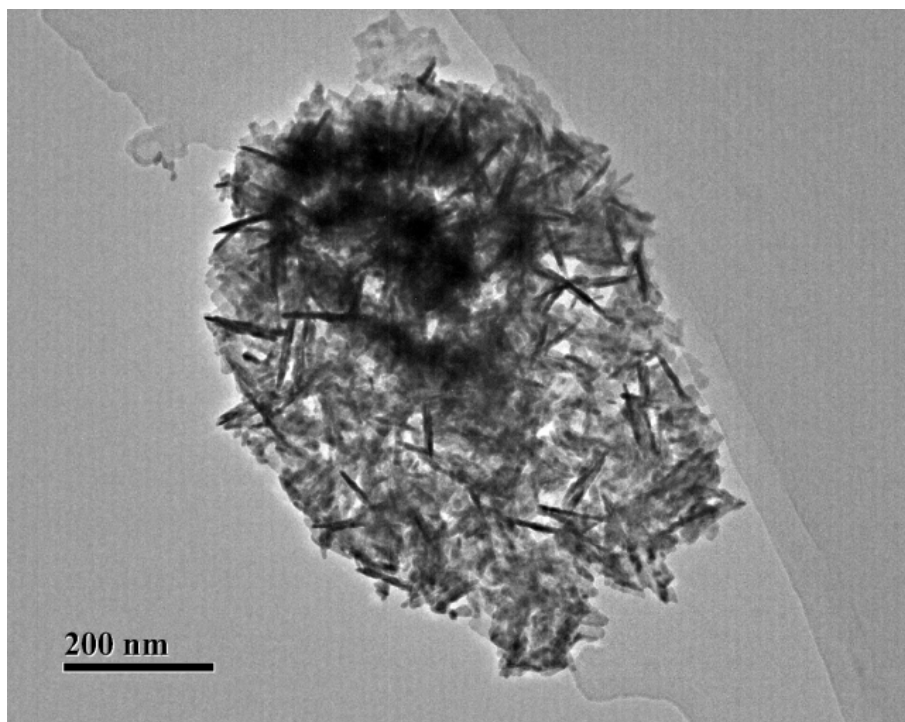

**Figure S2.** TEM image of pure  $\text{Bi}_2\text{MoO}_6$  at large scale.

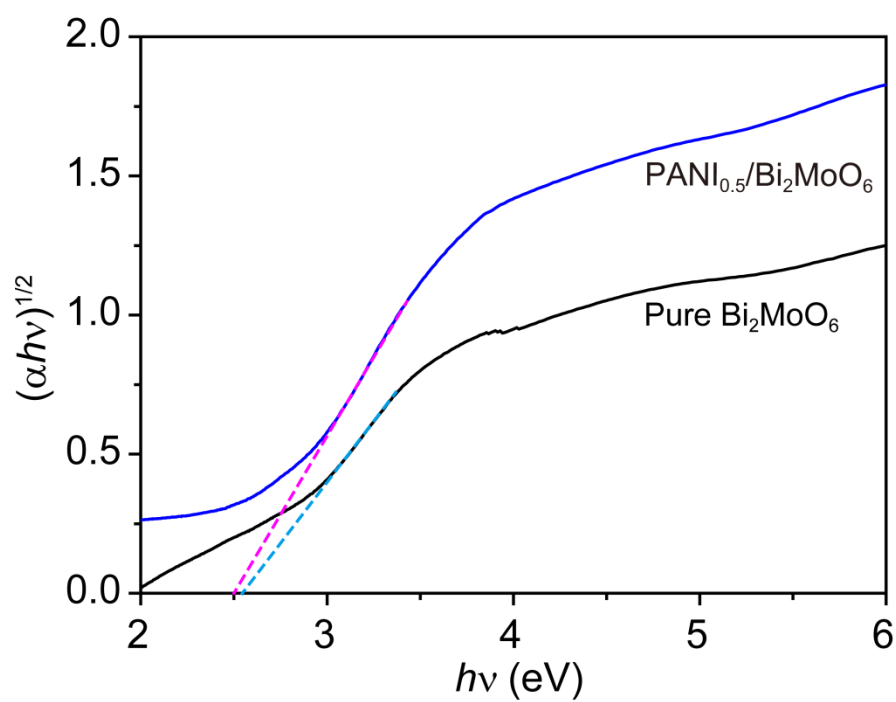

**Figure S3.** The Tauc plots and optical band gap evaluation for pure  $\text{Bi}_2\text{MoO}_6$  and  $\text{PANI}_{0.5}/\text{Bi}_2\text{MoO}_6$  derived from the UV-Vis absorption spectra.

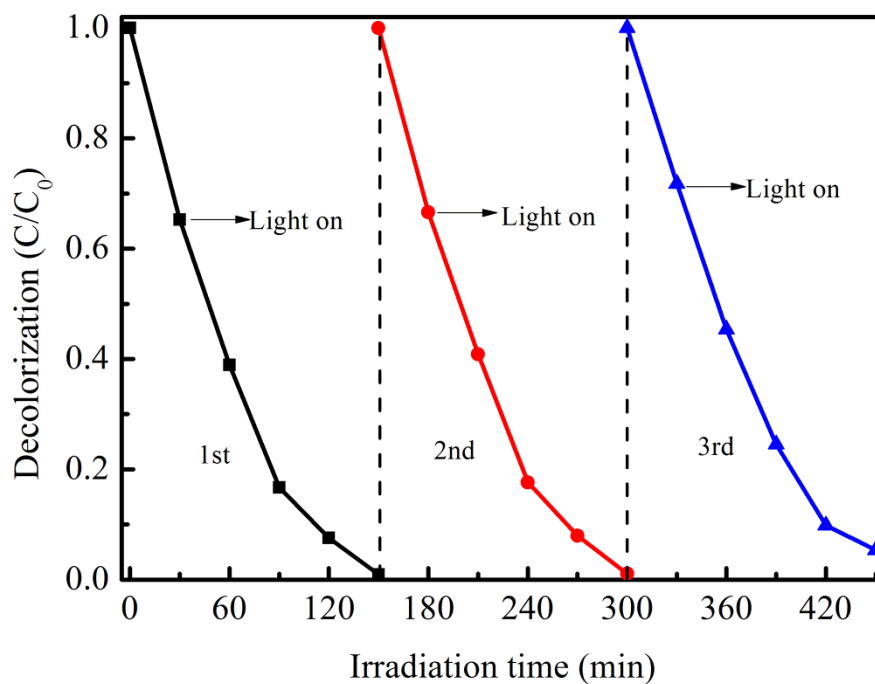

**Figure S4.** Recycle performance of PANI<sub>0.5</sub>/Bi<sub>2</sub>MoO<sub>6</sub> at the optimized conditions.

The adsorbed RhB to PANI<sub>0.5</sub>/Bi<sub>2</sub>MoO<sub>6</sub> was desorbed and re-activated in a mixture of water and ethanol.

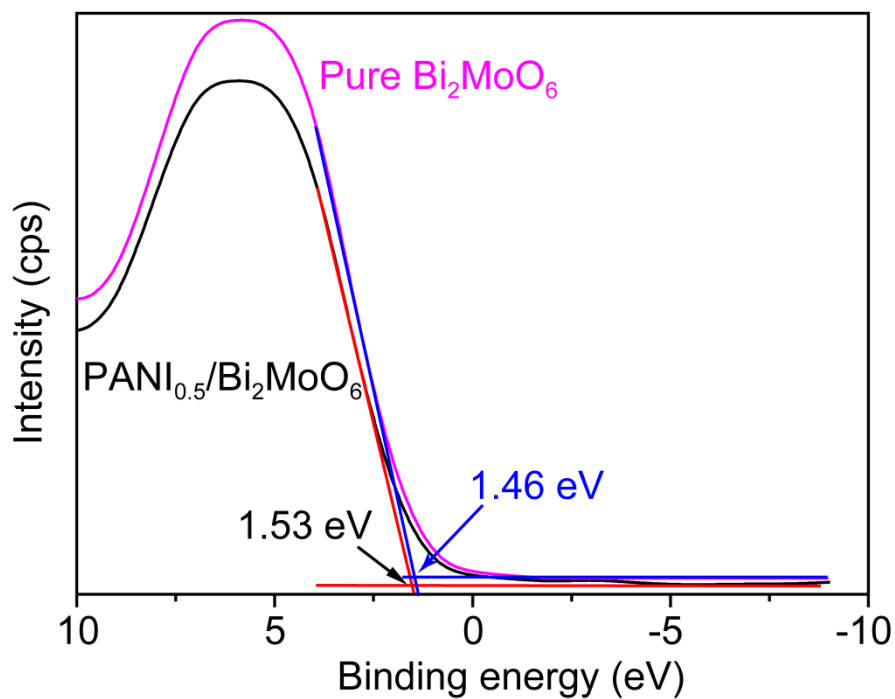

**Figure S5.** Valence band XPS spectra of Bi<sub>2</sub>MoO<sub>6</sub> and PANI<sub>0.5</sub>/Bi<sub>2</sub>MoO<sub>6</sub>.
